# Supplementary material for: An ionic liquid-modified nano-vehicle to construct nano-models of catalase to target mitochondria
Source: Royal Society of Chemistry journal article supplement (doi:10.1039/c2jm34354a), 2012-01-01
Supplement: c2jm34354a.pdf [file c2jm34354a.pdf]

## An ionic liquid modified nano-vehicle to construct nano models of catalase to target mitochondria

Xia Yang, Qiu-Yun Chen\*, Meng-Yun Kong, Ling-Ling-Qu, Zhi-Rong Geng, Zhi-Lin Wang

**Table S1** IR data for the nanoparticles and compounds

|                                     | $\nu(\text{C}=\text{O})$ | $\nu(\text{C}=\text{N})$ | $\nu(\text{Si}-\text{O})$ | $\delta(\text{C}-\text{H})$ of pyridyl | Mn-N |
|-------------------------------------|--------------------------|--------------------------|---------------------------|----------------------------------------|------|
| $\text{SiO}_2@IL\text{-PEG}$        |                          | 1659                     | 1075                      | 787                                    |      |
| $\text{Mndpa}@SiO_2@IL\text{-PEG}$  |                          | 1633                     | 1075                      | 791                                    | 683  |
| $\text{AdpaMn}@SiO_2@IL\text{-PEG}$ | 1570                     | 1633                     | 1075                      | 792                                    | 684  |
| AdpaMn                              | 1570                     |                          |                           | 794                                    | 685  |
| IL                                  | 1705                     |                          |                           | 781                                    |      |

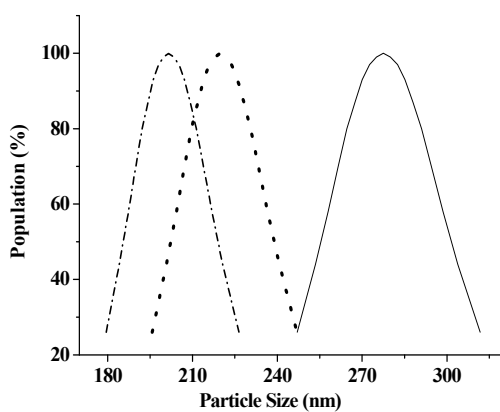

**Fig.S1** Size distribution of  $\text{SiO}_2@NH_2$  (solid line),  $\text{SiO}_2@IL$  (dot line) and  $\text{SiO}_2@IL\text{-PEG}$  (dash dot line) nanoparticles in water. The data are mean values for 3 experiments. Standard deviation < 0.07 .

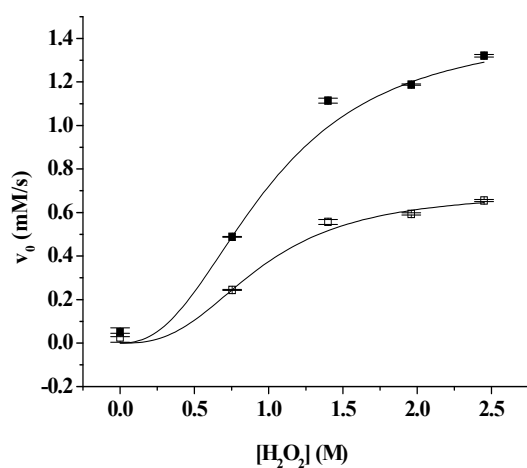

Fig. S2  $V_0$  vs concentration of  $\text{H}_2\text{O}_2$  plots of two kinds of nanoparticles (0.5 mM) in Tris-HCl, 37°C. AdpaMn@SiO<sub>2</sub>@IL-PEG (■), Mndpa@SiO<sub>2</sub>@IL-PEG (□).

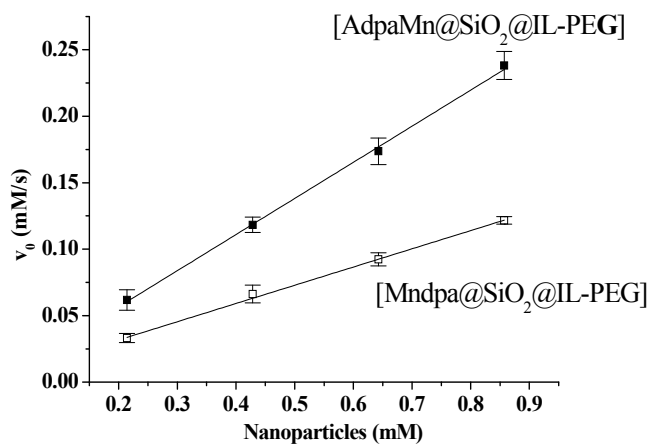

Fig. S3 Initial rate ( $V_0$ ) of substrate consumption vs concentration of nanoparticles in Tris-HCl, 37 °C. AdpaMn@SiO<sub>2</sub>@IL-PEG (■), Mndpa@SiO<sub>2</sub>@IL-PEG (□).
